# Supplementary material
Source: Springer Nature journal article supplement (https://www.springermedizin.de/resource/supplementary/12931_2014_1525_MOESM2_ESM.pdf/9426372)

### Symptoms Asthmatics

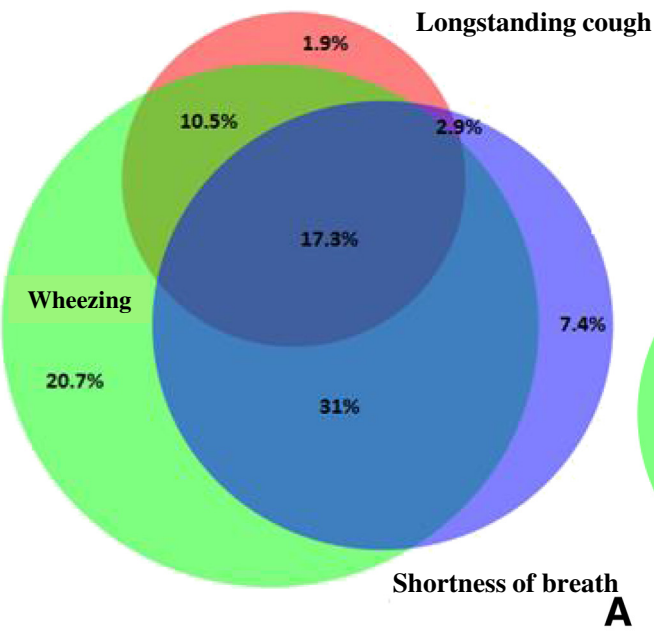

### Symptoms Controls

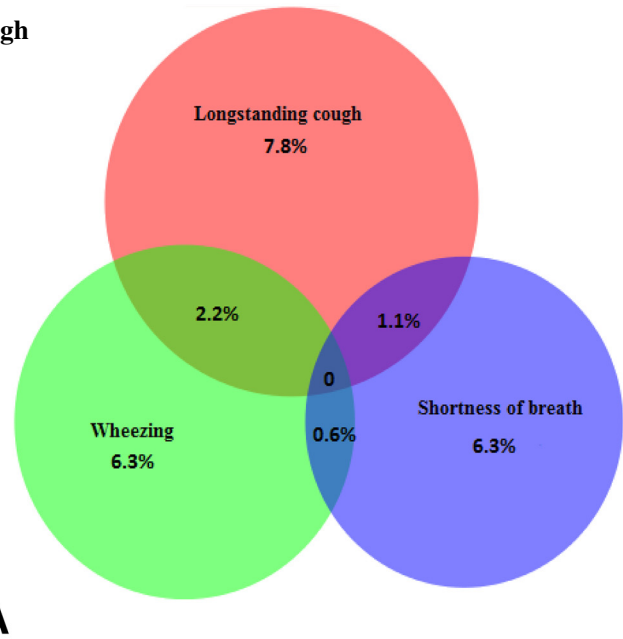

### Cough Asthmatics

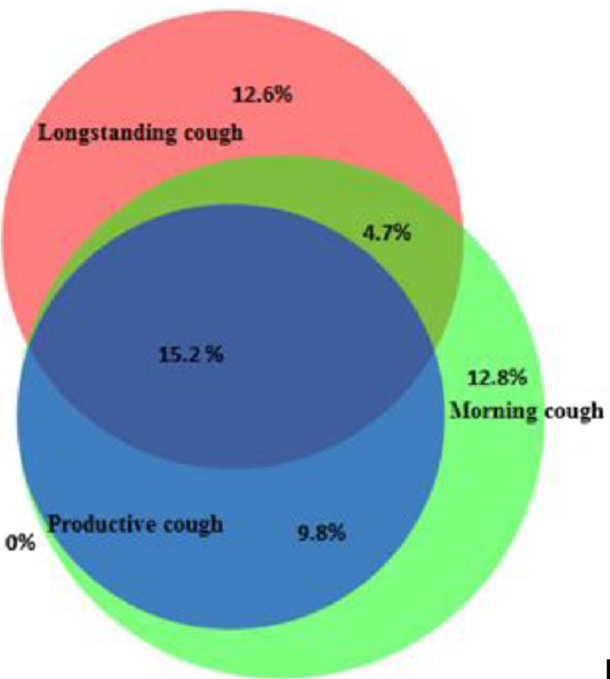

### Cough Controls

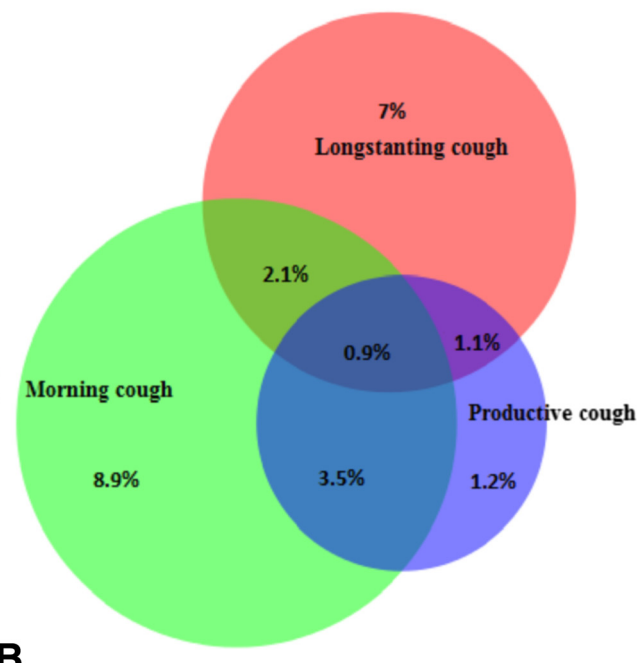

**A**

**B**

Supplement: MOESM2 [file 9426372]
